# Supplementary material
Source: publisher site journal article supplement (https://www.dovepress.com/get_supplementary_file.php?f=309602.docx)
Supplement: Supplementary file 1 [file get_supplementary_file.php]

**Appendix 1**

You are invited to participate in our survey on a new single-use endoscope for cystoscopies and your experience with reusable cystoscopes.

It will take approximately 3 minutes to complete the questionnaire. Your survey responses will be strictly confidential and data from this research will be reported only in the aggregate. Your information will be coded and will remain confidential.

Thank you very much for your time and support!

| Background information | |
| --- | --- |
| 1. In which country are you employed? |  France  Germany  Italy  Japan  Spain  United Kingdom  United States   Other |
| 1. What is your gender |  Male  Female  Other |
| 1. Are you working within procurement covering a urology department? |  Yes  No |
| 1. Are you a physician performing cystoscopies? |  Yes  No |
| 1. How many years have you been performing cystoscopies? |  <1 year  1-3 years  3-7 years  7-10 years  more than 10 years |
| 1. Where are you mainly employed? |  Hospital/Outpatient Clinic  Private clinic  Other |
| 1. How many cystoscopies does your department perform weekly? | __ years |
| 1. Are you in your institution's value analysis committee? |  Yes  No |
| Experience with reusable cystoscopes | |
| 1. How is reprocessing currently conducted in your department? |  Central Cleaning  External Cleaning   Local Cleaning (at the department) |
| 1. How old is your oldest cystoscope in use? | __ years |
| 1. How is the endoscopy cleaning process at your urology department? |  Tristel Wipes  Chemical baths   High-Level Disinfection (HLD) (Washing machine)   Sterilization  I don’t know  Other |
| 1. Does your urology department use single-use ureteroscopes? |  Yes  No |
| 1. Have you ever been concerned about cystoscopy-related infections as a result of contaminated cystoscopes? |  Yes  No |
| 1. How often do you have to wait for a cystoscope to become available? |  Never  Rarely  Often |
| 1. Have you ever experienced that your reusable cystoscope lost image quality or lacked proper maneuverability? |  Yes  No |
| 1. How important is cost transparency when purchasing cystoscopes? |  Not at all important  Slightly important   Moderately important  Very important   Extremely important |
| 1. How many of your cystoscopy procedures would you consider using a single-use instead of a reusable cystoscope? | __ % of all cystoscopy procedures |
